# Supplementary material
Source: Springer Nature journal article supplement (https://www.springermedizin.de/resource/supplementary/12879_2011_1930_MOESM1_ESM.pdf/9443320)
Supplement: MOESM1 [file 9443320]

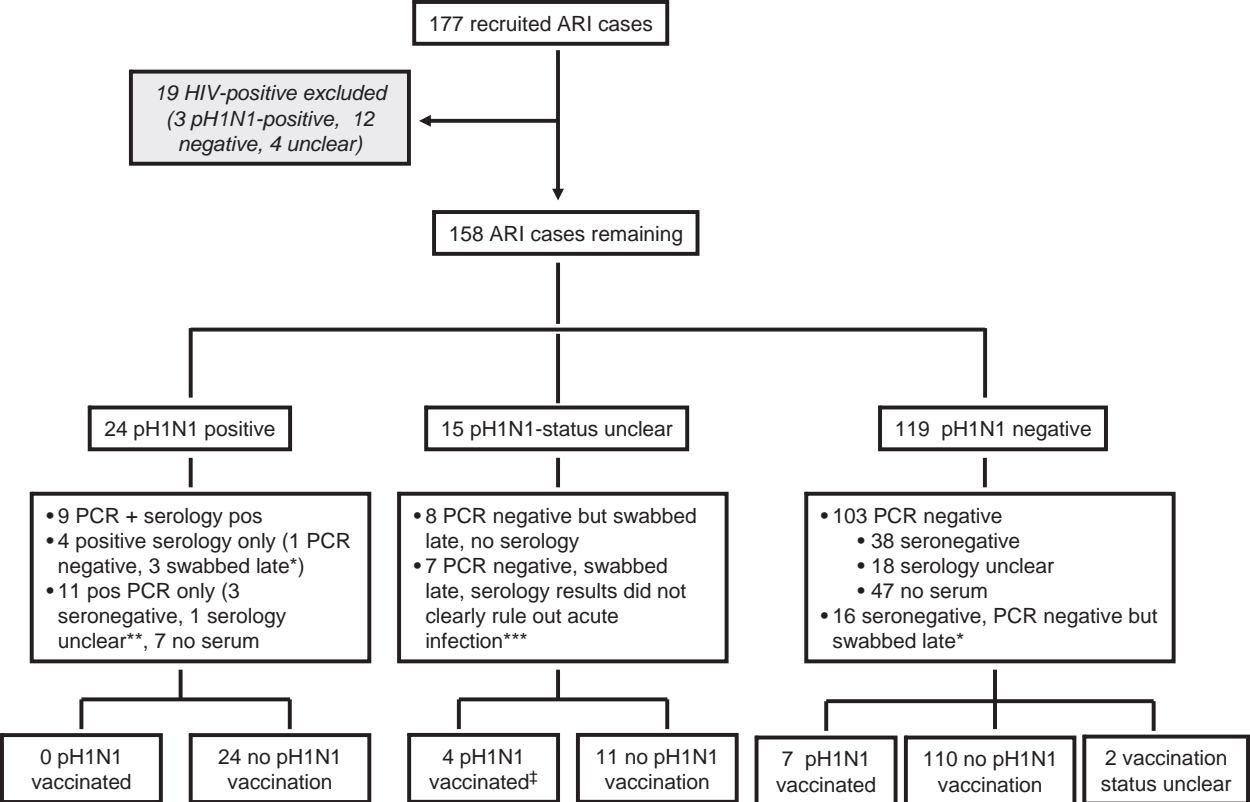

\*Swabbed >7 days after symptom onset \*\*pH1N1 titre 1:80 on day 10 and day 35 \*\*\* 1st serum sample taken > 7 days after symptom onset (8-13 days), 5 had identical titre in 1st and 2nd sample (range 1:20-1:320); 2 had 2-fold titre increases from 1:20-1:40 (interval b/w 1st and 2nd serum=7 days) and 1:40 to 1:80) \*\*\*\* pH1N1-titer in first serum >0, but no four-fold increase (n=10), titre increase from 0 to 1:10 (n=1) † Swabbed on days 8 (2), 10 (1) and 13 (1)
